# Supplementary material
Source: PubMed Central journal article supplement (PMC3614002)
Supplement: NIHMS447476-supplement-supplement_1.pdf [file NIHMS447476-supplement-supplement_1.pdf]

Figure S1, related to Figure1.

Figure S2, related to Figure2.

Figure S3, related to Figure3.

Figure S4, related to Figure4.

Figure S5, related to Figure5.

Figure S6, related to Figure6

Figure S7, related to Figure7

Supplemental Figure Legends

Table 1, *S. cerevisiae* Strains Used in this Study.

Supplemental Experimental Procedures.

References.

Wang et al. Figure S1, related to Figure 1

A.

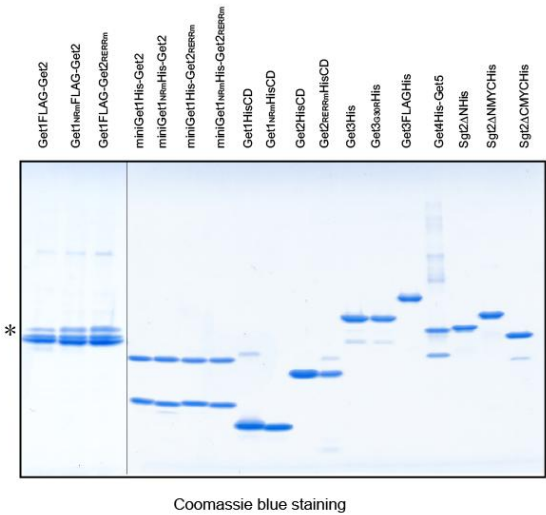

B.

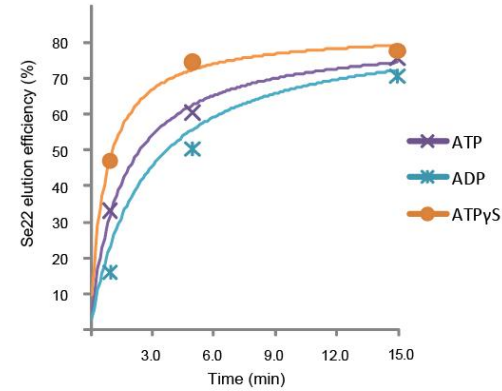

C.

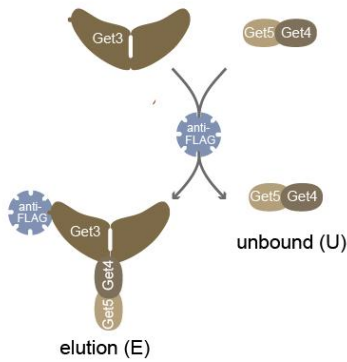

1. Get3FLAG + Get4-Get5  
binding with indicated nucleotides  
or Apyrase

2. anti-FLAG pull-down

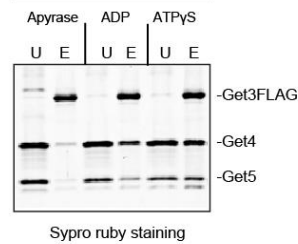

A.

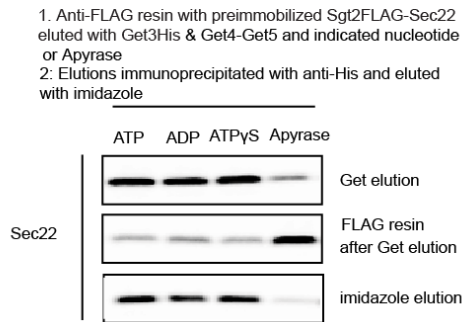

B.

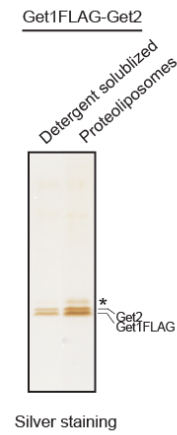

C.

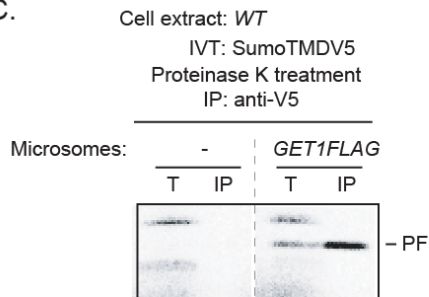

D.

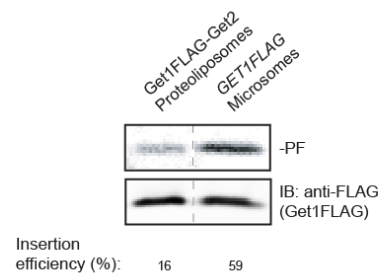

A.

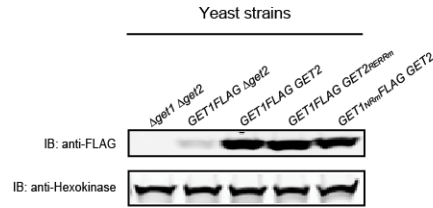

B.

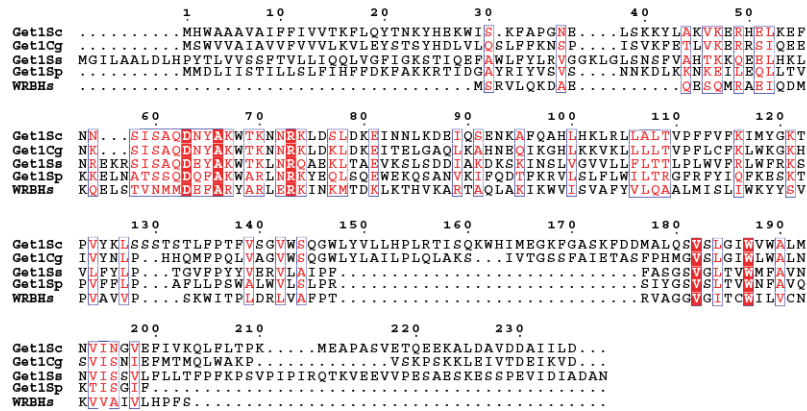

C.

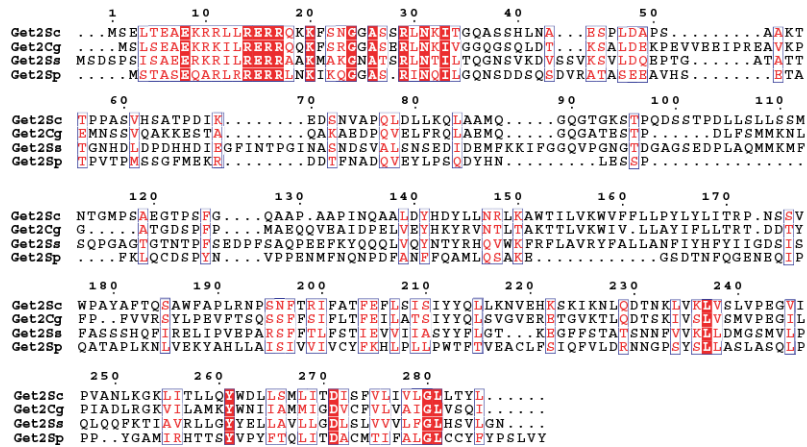

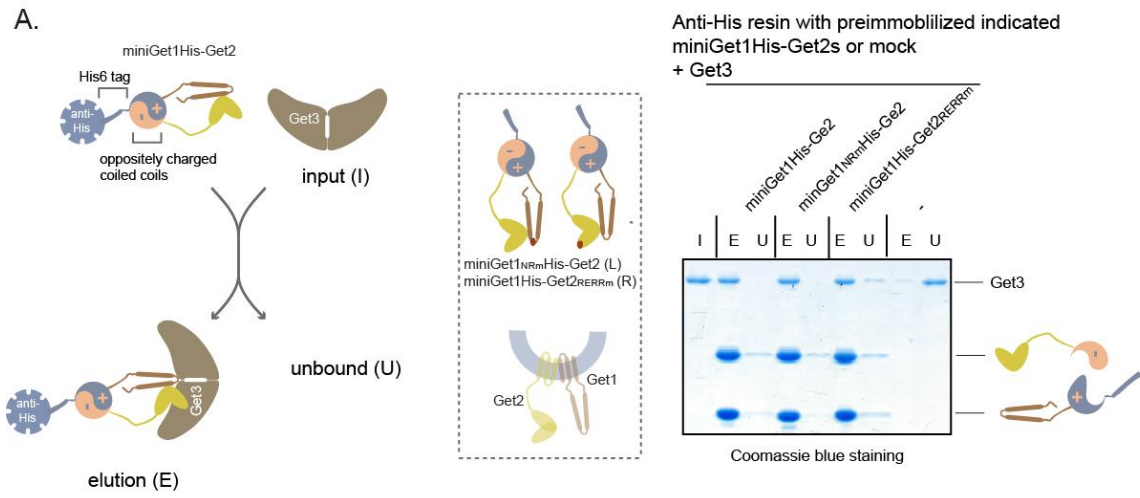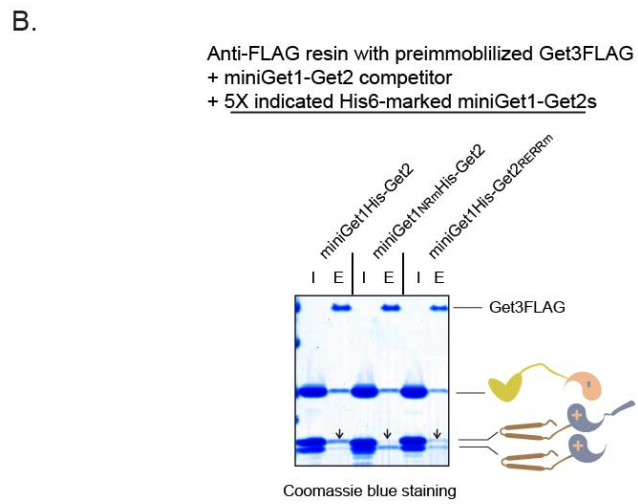

A.

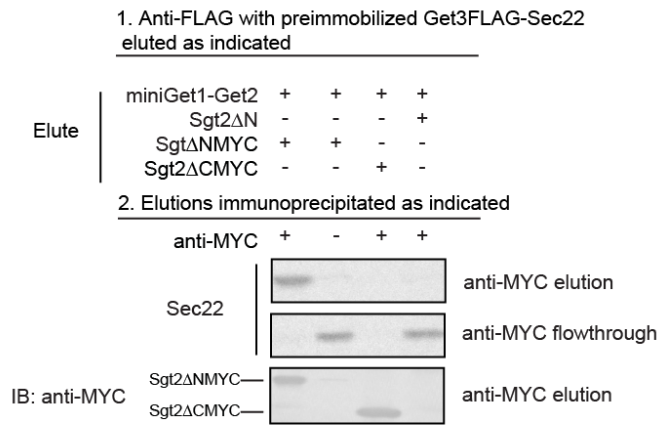

B.

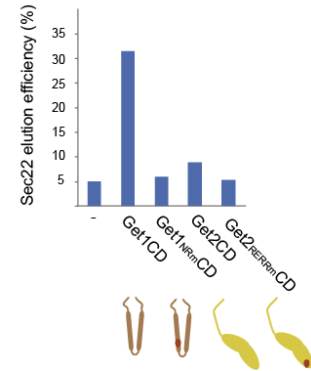

A.

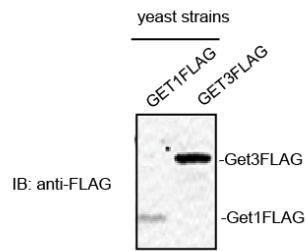

B.

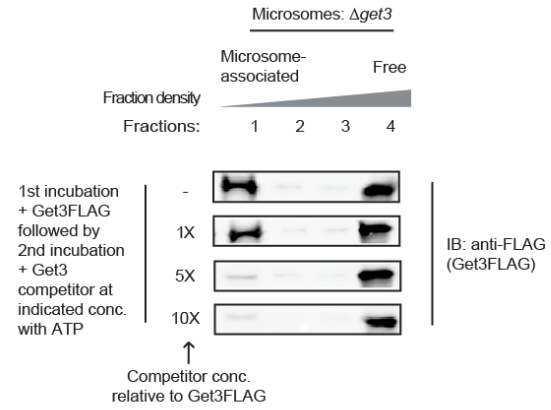

C.

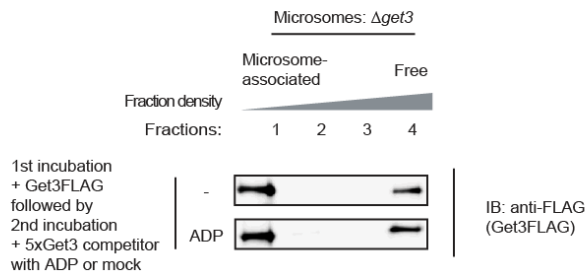

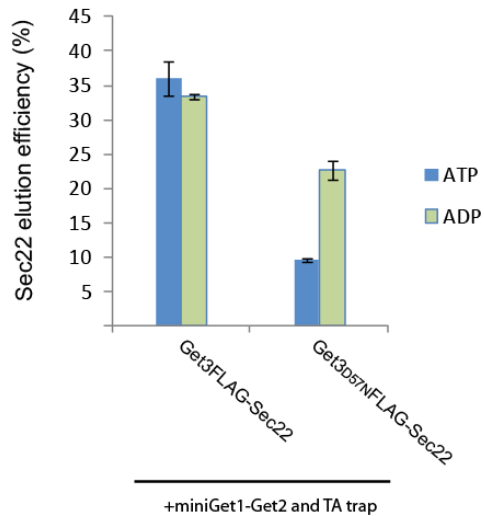

## SUPPLEMENTAL FIGURE LEGENDS

### Figure S1. Purified Proteins Used in this Study; Nucleotide Effects on the Rate of TA Protein Transfer from Sgt2-Get5-Get4 to Get3 and on Get4-Get5 Binding to Get3

(A) The indicated proteins were expressed and purified as described in the Experimental Procedures, resolved by SDS-PAGE, and visualized by Coomassie blue staining. Mass spectrometry of the faint band labeled with \* revealed that it is a species of Get2 (data not shown) that most likely results from glycosylation of one of the two predicted luminal N-glycan acceptor sites.

(B) *In vitro* translation (IVT) of Sec22 in *SGT2FLAG Δget3/5* extract was followed by anti-FLAG immunoprecipitation (IP) and elution with Get3 (0.32 μg/μL) and Get4-Get5 (0.48 μg/μL) in the presence of the indicated nucleotides (1 mM). Notably, elution was carried out at 4°C to slow down the kinetics of elution (data not shown) and allow enough time for sample processing. Samples were prepared and analyzed as in Figure 1B. Shown is the percentage of Sec22 eluted at different times following the addition of Get proteins to immobilized Sgt2-Sec22.

(C) (ON THE LEFT) Schematic showing binding of Get4-Get5 to Get3FLAG preimmobilized on anti-FLAG resin. (ON THE RIGHT) Get3FLAG (64 ng/μL) and Get4-Get5 (96 ng/μL) were incubated at room temperature for 20 minutes in the presence of the indicated nucleotides (1 mM). This was followed by anti-FLAG immunoprecipitation at 4°C for 30 minutes. Following centrifugation, the unbound (U) fraction was collected, and the remaining resin washed and eluted with 3XFLAG peptide (E). Samples were resolved by SDS-PAGE and visualized by Sypro ruby staining.

### Figure S2. Purification of Get3-Sec22 after Sec22 Transfer from Sgt2-Get5-Get4 to Get3; Purified and Proteoliposome Reconstituted Get1-Get2 Transmembrane Complex; Immunoprecipitation of the PF; Specific Insertion Activity of Proteoliposomes

(A) Sec22 elution from preimmobilized Sgt2-Sec22 with Get3His, Get4-Get5, nucleotides (3 mM) or Apyrase (1 U/μL), as indicated, was carried out as in Figure 1B. Elutions were immunoprecipitated (IP) with anti-His resin and the bound material washed and eluted with imidazole. Samples were resolved by SDS-PAGE and analyzed by autoradiography.

(B) Get1FLAG-Get2 was affinity purified with anti-FLAG resin from digitonin-solubilized microsomes that were obtained from a *Δget3* strain engineered to overexpress Get1FLAG and Get2. Digitonin was exchanged with BigCHAP prior to elution with 3xFLAG peptide. Proteoliposomes were reconstituted by BigCHAP removal with SM2 Bio-beads in the presence of synthetic phospholipids (see Experimental Procedures for more detail). Purified Get1FLAG-Get2 in BigCHAP and Get1-Get2 proteoliposomes were resolved by SDS-PAGE and visualized by silver staining. Mass spectrometry of the band labeled with \* revealed that it is a species of Get2 (data not shown), most likely glycosylated at one of the two N-glycan acceptor sites predicted to reside on the luminal side of the ER membrane.

(C) SumoTMDV5 *in vitro* translated (IVT) in the wild-type (WT) extract was incubated with *GET1FLAG Δget3* microsomes or mock incubated for 30 minutes at room temperature. Following Proteinase K treatment and detergent solubilization, samples were immunoprecipitated (IP) with anti-V5 resin. Eluted and starting total (T) samples were resolved by SDS-PAGE and analyzed by autoradiography. PF indicates the position of the protected fragment.

(D) *GET1FLAG Δget3* microsomes (1 μL at OD<sub>280</sub> ~80: an amount comparable to the ones used in all the insertion assays) and Get1FLAG-Get2 proteoliposomes (0.5 μL: an amount comparable to the ones used in all the insertion assays) were analyzed by immunoblotting (IB) with anti-FLAG and protease protection as in Figure 2B.

**Figure S3. Total Protein Level of Get1 and Get2 is Unaffected by the NRM/RERRm Mutations; Sequence Alignment of Get1/2 Homologs**

(A) Total cell lysates from the indicated yeast strains were resolved by SDS-PAGE and analyzed by immunoblotting (IB) with the indicated antibodies. Note that Get1 levels decrease when Get2 is absent and vice versa (Schuldiner et al., 2008). This suggests that Get1 and Get2 molecules that are not paired up in transmembrane complexes are subject to ER-associated degradation.

(B) and (C) Clustal W2 amino acid sequence alignment of Get1 and Get2 homologs. See Figures 3A and 3B for more details.

**Figure S4. Cooperative Binding of Get3 to the Cytosolic Domains of Get1 and Get2**

(A) (ON THE LEFT) Schematic showing binding of Get3 to miniGet1His-Get2 preimmobilized on anti-His resin. (ON THE RIGHT) The indicated miniGet1His-Get2s were preimmobilized and incubated with Get3FLAG input (I) (Get3FLAG: miniGet1His-Get2 molar ratio equals 1:6) in the presence of ADP (3mM) for 20 minutes at room temperature. Following centrifugation, the unbound (U) material was collected and the resin was washed and then eluted (E) with SDS gel loading buffer. Samples were resolved by SDS-PAGE and visualized by Coomassie blue staining.

(B) Anti-FLAG resin with pre-immobilized Get3FLAG was incubated with the indicated His-marked miniGet1-Get2s and miniGet1-Get2 competitor inputs (I) (Get3FLAG:miniGet1His-Get2:miniGet1-Get2 molar ratio equals 1:10:2) in the presence of ADP (3 mM) for 20 minutes at room temperature. Following washing, the resin was eluted (E) with FLAG peptide. Samples were resolved by SDS-PAGE and visualized by Coomassie blue staining. To distinguish miniGet1-Get2 from miniGet1His-Get2s on a gel, we have proteolytically removed the C-terminal His6 tag (separated by a thrombin site from the engineered coiled coil fused to Get1) from the former. Arrows point to the positions on the gel at which we expect to see His-tagged Get1 bands if they are able to compete for binding to Get3.

**Figure S5. Sec22 Released from Get3-Sec22 by miniGet1-Get2 is in the TA Trap; Get1CD has Substrate-Releasing Activity**

(A) Sec22 elution from immobilized Get3FLAG-Sec22 in the presence miniGet1-Get2 (6  $\mu$ M), the indicated Sgt2 derivatives, and ADP (2.75 mM ADP) for 20 minutes at room temperature. Elutions were immunoprecipitated with protein G Dynabeads with or without the anti-MYC antibody, as indicated. Following centrifugation, the flowthrough was collected and the resin was washed and then eluted with SDS gel loading buffer. Samples were resolved by SDS-PAGE and visualized by immunoblotting (IB) with anti-MYC and autoradiography.

(B) Sec22 elution from immobilized Get3FLAG-Sec22 in the presence of the indicated Get1/2 cytosolic domains (1.5  $\mu$ M) and nucleotide (2.75 mM). Elution was carried out in the presence of Sgt2 $\Delta$ N (0.1  $\mu$ g/ $\mu$ L) and analyzed as in Figure 5B.

**Figure S6. Cellular Get3 is in Excess to Get1/2; Excess Get3 Outcompetes Get3FLAG from the Membrane; ADP doesn't Stimulate Get3 Dissociation from the Membrane**

(A) Whole cell lysates of *GET1FLAG* and *GET3FLAG* yeast strains were resolved by SDS-PAGE and analyzed by immunoblotting (IB) with anti-FLAG. Anti-hexokinase immunoblotting revealed that the samples were evenly loaded (data not shown). ImageQuant software established that the Get3FLAG signal is approximately six times that of Get1FLAG.

(B)  $\Delta get3$  microsomes ( $0.8 A_{280}$  units) were incubated with Get3FLAG ( $0.1 \mu\text{g}$ ) in the absence of nucleotide for 20 minutes at room temperature ( $1^{\text{st}}$  incubation), and then split and incubated with ATP ( $4 \text{ mM}$ ) and indicated amounts of Get3 competitor ( $0.1 \mu\text{g}$  equals  $1X$ , lacking the FLAG tag) for another 20 minutes at room temperature ( $2^{\text{nd}}$  incubation). Samples were analyzed by flotation analysis and immunoblotting (IB) with anti-FLAG as in Figure 3D.

(C)  $\Delta get3$  microsomes ( $0.8 A_{280}$  units) were incubated with Get3FLAG ( $0.1 \mu\text{g}$ ) in the absence of nucleotide for 20 minutes at room temperature ( $1^{\text{st}}$  incubation), and then split and incubated with the indicated nucleotides ( $4 \text{ mM}$ ) and Get3 competitor ( $0.5 \mu\text{g}$ , lacking the FLAG tag) for another 20 minutes at room temperature ( $2^{\text{nd}}$  incubation). Samples were analyzed by flotation analysis and immunoblotting (IB) with anti-FLAG as in Figure 3D.

**Figure S7. MiniGet1-Get2 Can't Induce Substrate Release from Get3D57N in the Presence of ATP but Release is Rescued by ADP**

Sec22 elution from immobilized Get3FLAG-Sec22 or Get3D57NFLAG by miniGet1-Get2 ( $6 \mu\text{M}$ ) in the presence of ATP or ADP (both at  $2.75 \text{ mM}$ ). Elution was carried out in the presence of Sgt2 $\Delta$ N ( $0.1 \mu\text{g}/\mu\text{L}$ ) and analyzed as in Figure 5B. Average Sec22 elution efficiency and standard deviation from two independent experiments are plotted.

**Table 1: *S. cerevisiae* Strains Used in this Study**

| Genetic Background                              | Deletion(s)                            | Epitope Tag                                                                        | Strain Number |
|-------------------------------------------------|----------------------------------------|------------------------------------------------------------------------------------|---------------|
| BY4741                                          | (none)                                 | <i>Get3FLAG::kan</i>                                                               | VDY10         |
|                                                 |                                        | <i>Get1FLAG::kan</i>                                                               | VDY9          |
|                                                 | <i>Δget1::kan</i><br><i>Δget2::nat</i> | (none)                                                                             | VDY35         |
|                                                 | <i>Δget3::kan</i>                      | (none)                                                                             | VDY36         |
|                                                 | <i>Δget3::ura</i><br><i>Δget5::his</i> | <i>Sgt2FLAG::kan</i>                                                               | VDY47         |
|                                                 | <i>Δget3::his</i>                      | <i>Get1FLAG::kan</i>                                                               | VDY82         |
|                                                 |                                        | <i>Get1NRmFLAG::kan</i>                                                            | VDY84         |
|                                                 |                                        | <i>Get1FLAG::kan</i><br><i>Get2RERRm</i>                                           | VDY85         |
|                                                 |                                        | <i>nat::pTDH3</i><br><i>Get1NRmFLAG::kan</i><br><i>ura::pTDH3</i><br><i>Get2</i>   | VDY168        |
|                                                 |                                        | <i>nat::pTDH3</i><br><i>Get1FLAG::kan</i><br><i>ura::pTDH3</i><br><i>Get2RERRm</i> | VDY173        |
| Obtained from a cross between BY4741 and BY4742 | <i>Δget3::kan</i>                      | <i>nat::pTDH3</i><br><i>Get1FLAG::kan</i><br><i>nat::pTDH3</i><br><i>Get2</i>      | VDY343        |

## SUPPLEMENTAL EXPERIMENTAL PROCEDURES

### *S. cerevisiae* Strain Construction

Deletion strains were constructed in the BY4741 genetic background (Brachmann et al., 1998) by PCR-mediated knock-out with one of the following drug resistance or prototrophic marker cassettes: pFA6a-kanMX6/pFA6a-NAT (Longtine et al., 1998), pKIURA/pCgHIS (Goldstein and McCusker, 1999). C-terminal triple FLAG tag and TDH3 promoter were introduced by PCR-mediated epitope/promoter tagging as described previously (Denic and Weissman, 2007).

NRm and RERRm mutations were introduced by first knocking out with *URA3* the appropriate genomic region of either Get1 or Get2, respectively. This was followed by transformation with the appropriate OE PCR products containing the mutations and then 5-FOA counterselection.

VDY343 is a nonparental ditype generated from a cross between

BY4741 *nat::pTDH3Get1FLAG::kan*

and BY4742 *nat::pTDH3Get2 Δget3::kan*.

### Plasmid Construction

SumoTMDV5 was created by subcloning annealed complementary oligonucleotides that encode the V5 tag into the NotI/XhoI sites of pET29SUMOTMD (Wang et al., 2010).

The vector for bacterial expression of His6-tagged Get3G30R was created by introducing the G30R mutation into pET29Get3 (Wang et al., 2010) by overlap extension (OE) PCR. Vectors for bacterial expression of His6-tagged Sgt2 $\Delta$ NMYC, and Sgt2 $\Delta$ CMYC were created by subcloning annealed complementary oligonucleotides encoding the 2XMYC tag into the BamHI/NotI sites of pET29Sgt2 $\Delta$ N and pET29Sgt2 $\Delta$ C (Wang et al., 2010), respectively.

Vectors for bacterial expression of His6-tagged Get1CD and Get2CD were created by subcloning PCR amplified regions of genomic Get1 and Get2 encoding amino acids (a.a.) 19- 102 and 1- 150, respectively, into the NdeI/KpnI restriction sites of pET29b. NRm and RERRm mutations were introduced into pET29Get1CD and pET29Get2CD, respectively, by OE PCR.

The vector for bacterial expression of miniGet1-Get2 was generated by subcloning PCR amplified regions of genomic Get1 (a.a 20-102), coiled coil region of pActPL-Gal4AD (Addgene; amino acid sequence:

GSGSLEIEAAFLERENTALETRVAELRQQRVQRLRN RV SQNRTRYGPLGGGK), genomic Get2 (a.a. 1-150), and coiled coil region of pActPL-Gal4DBD (Addgene; amino acid sequence:

GSGSLEIRAAFLRQQRNTALRTEVAELEQEVQRLNEVSQYETRYGPLGGGK) into the NcoI/SacI, SacI/PstI, NdeI/XhoI and XhoI/PacI sites of pETDUET-1 (Novagen), respectively. Notably, only the Get1CD fusion with the coiled coil has a C-terminal His6 tag. After bacterial expression and Ni-NTA purification, Get2CD coiled coil copurifies as

part of the miniGet1-Get2 complex. NRm and RERRm mutations were introduced into pETDUETminGet1-Get2 OE PCR.

All the other vectors used in this study were described previously (Wang et al, 2010 or references therein).

Primer sequences used in these plasmid constructions are available upon request.

### **Recombinant Protein Expression and Purification**

pET-based protein expression was carried out by IPTG induction in BL21 DE3 *E. coli* cells as described previously (Wang et al., 2010). In addition Get3G30R, Get1CD, Get1CDNRm, Get2CD, and Get2CDRERRm were expressed at 17°C for 16 hours to enhance solubility. All the miniGet1-Get2 constructs were expressed at 23 °C for 7 hours. Ni-NTA purification of His-tagged proteins was carried out as described previously (Wang et al., 2010). In addition to the final gel filtration step used in all the purification schemes, some preps necessitated ion-exchange chromatography after elution with imidazole from Ni-NTA to obtain a high level of purity. When appropriate, the His6-tag was removed from purified proteins by Thrombin cleavage as described previously (Wang et al., 2010).

### ***In Vitro* Transcription, Translation, and TA Protein Insertion**

Capped mRNAs were *in vitro* transcribed from the appropriate PCR products using the mMessage mMachine T7 kit (Ambion) as described previously (Schuldiner et al., 2008).

Yeast *in vitro* translation extracts and translocation-competent, ER-derived membrane (microsomes) were prepared as described before (Wang et al., 2010).

*In vitro* translation and TA protein insertion were performed as described before (Wang et al., 2010). Insertion efficiency was determined by phosphorimager analysis using a Typhoon imaging system with ImageQuant TL software (GE).

### **Native Talon (Anti-His) IP**

Anti-His IP in experiments shown in Figures S2A, S4A, and 5F was carried out as described previously (Wang et al., 2010).

### **Protease Protection Assay for Monitoring TA Protein Insertion**

This procedure is a modification of the one described previously (Stefanovic and Hegde, 2007). Following insertion, Proteinase K (PK) was added to the final concentration of 0.5 mg/mL and incubated for 1 hour on ice. PMSF was then added to 10 mM and after 5 more minutes on ice, the samples were transferred to 10 volumes of boiling 1% SDS/0.1 M Tris, pH 8. Boiling was continued for at least 2 more minutes to ensure complete inactivation of PK. In the experiments shown in Figures 2B, S2D, and 3D, samples were analyzed directly by SDS-PAGE. In the proof of concept experiment shown in Figure S2C, following PK inactivation, samples were diluted 10-fold with IP buffer (1% Triton X-100, 100 mM NaCl, 50 mM Hepes, pH 7.4) at 4°C and the V5 antibody added along with Protein G Dynabeads (Invitrogen). After overnight (~16 h) incubation at 4°C with agitation, the beads were washed three times with IP buffer and eluted by boiling in SDS-PAGE sample buffer.

### **Microsome Flotation Analysis**

Microsome flotation in an Optiprep gradient was carried out as described previously (Schuldiner et al., 2008), with minor modifications. In the experiment shown in Figure 6B, 10  $\mu$ L of microsomes were mixed with 1  $\mu$ L of 0.1 mg/mL recombinant Get3FLAG protein and the final volume was brought up to 24  $\mu$ L with 20 mM HEPES/KOH, pH 6.8, 5 mM Mg(OAc)<sub>2</sub>, 150 mM KOAc, and 250 mM sorbitol. After 20 minutes incubation at room temperature, samples were mock incubated without nucleotide on ice for 20 minutes or incubated with 4 mM nucleotide (ATP, ADP or ATP $\gamma$ S) for 20 minutes at room temperature before flotation. In the experiment shown in Figure 3D, 10  $\mu$ L of Get3FLAG-Sec22 complex purified by native FLAG IP and eluted with 3XFLAG peptide was mixed with microsomes and buffer as described above and incubated for 20 minutes at room temperature before flotation. Gradient fractions were concentrated by chloroform/methanol protein precipitation before SDS-PAGE analysis.

### **Kar2 Secretion Assay**

This assay was performed exactly as described (Belden and Barlowe, 2001) with the following modifications. Samples were precipitated in TCA overnight at -20 °C. Washed acetone pellets were resuspended in 50  $\mu$ L of alkaline SDS-PAGE loading buffer and one-tenth analyzed by immunoblotting with the anti-Kar2 antibody (gift from P. Walter).

### **miniGet1-Get2 Competition Pull-Down**

1 µg of recombinant Get3FLAGHis was incubated with 10 µL anti-FLAG-M2 affinity gel slurry (Sigma) pre-equilibrated in binding buffer (50 mM HEPES-KOH pH 6.8, 10 mM Mg(OAc)<sub>2</sub>, 150 mM NaCl, 2mM DTT, 10% glycerol, 3mM ADP) for 30 minutes at 4 °C with agitation. The resin was then washed three times with 200 µL ice-cold binding buffer before incubating it with miniGet1-Get2 proteins as indicated in Figures 4C and S4B (30 µL final volume in binding buffer) for 20 minutes at room temperature. Following three binding buffer washes, bound proteins were eluted with 0.5 mg/mL 3×FLAG peptide (Sigma).

### **Get3 Pull-Down by MiniGet1-Get2**

Dynabeads Talon (Invitrogen) was used according to the manufacturer's instructions. 24 µg of recombinant mini-Get1His-Get2s indicated in Figure S4 were incubated with 10 µL of Dynabeads pre-equilibrated in 100 uL binding buffer (50 mM HEPES-KOH pH 6.8, 10 mM Mg(OAc)<sub>2</sub>, 150 mM NaCl, 2mM DTT, 10% glycerol, 3mM ATP) for 1 hour at 4 °C with agitation. The resin was then washed three times with 100 µL ice-cold binding buffer before incubating it with 2 µg of Get3 (His Tag removed by Thrombin, 30 µl final volume in binding buffer) for 20 minutes at room temperature. Following three ice-cold binding buffer washes, bound material was eluted with SDS gel loading buffer containing 250 mM imidazole.

### **Native MYC IP**

5 µg of anti-MYC (9E10) antibody was preimmobilized onto 1 mg of Protein G Dynabeads (Invitrogen) according to the manufacturer's instructions. Material eluted

from preimmobilized Get3FLAG-Sec22 in Figure S5A (36  $\mu$ L) was incubated with Protein G Dynabeads with preimmobilized anti-MYC (or mock) for 30 minutes at 4°C with agitation. Following washing with ice-cold IP buffer (20 mM HEPES-KOH pH 7.4, 2 mM  $\text{Mg}(\text{OAc})_2$ , 100 mM KOAc, 2 mM DTT, 14% glycerol), the resin was eluted with SDS gel loading buffer.

### **Denaturing Whole-Cell Lysate Preparation**

Samples in Figures S3A and S6A were prepared as described previously (Wang et al., 2010).

## REFERENCES

- Belden, W.J., and Barlowe, C. (2001). Deletion of yeast p24 genes activates the unfolded protein response. *Mol Biol Cell* *12*, 957-969.
- Brachmann, C.B., Davies, A., Cost, G.J., Caputo, E., Li, J., Hieter, P., and Boeke, J.D. (1998). Designer deletion strains derived from *Saccharomyces cerevisiae* S288C: a useful set of strains and plasmids for PCR-mediated gene disruption and other applications. *Yeast* *14*, 115-132.
- Denic, V., and Weissman, J. (2007). A molecular caliper mechanism for determining very long-chain fatty acid length. *Cell* *130*, 663-677.
- Goldstein, A., and McCusker, J. (1999). Three new dominant drug resistance cassettes for gene disruption in *Saccharomyces cerevisiae*. *Yeast* *15*, 1541-1553.
- Longtine, M., McKenzie, A.r., Demarini, D., Shah, N., Wach, A., Brachat, A., Philippsen, P., and Pringle, J. (1998). Additional modules for versatile and economical PCR-based gene deletion and modification in *Saccharomyces cerevisiae*. *Yeast* *14*, 953-961.
- Schuldiner, M., Metz, J., Schmid, V., Denic, V., Rakwalska, M., Schmitt, H., Schwappach, B., and Weissman, J. (2008). The GET complex mediates insertion of tail-anchored proteins into the ER membrane. *Cell*, 634-645.
- Stefanovic, S., and Hegde, R. (2007). Identification of a targeting factor for posttranslational membrane protein insertion into the ER. *Cell*, 1147-1159.
- Wang, F., Brown, E.C., Mak, G., Zhuang, J., and Denic, V. (2010). A chaperone cascade sorts proteins for posttranslational membrane insertion into the endoplasmic reticulum. *Mol Cell* *40*, 159-171.
